# Supplementary material for: A phase 1 study of oral ridaforolimus in pediatric patients with advanced solid tumors
Source: PubMed Central journal article supplement (PMC5356695; doi:10.18632/oncotarget.12450), 2016-10-04
Supplement: oncotarget-07-84736-s001.pdf [file oncotarget-07-84736-s001.pdf]

## A phase 1 study of oral ridaforolimus in pediatric patients with advanced solid tumors

### SUPPLEMENTARY TABLE

Supplementary Table S1: Ridaforolimus dosing nomogram in pediatric patients

| Dose level <sup>b</sup> | Target dose level, mg/m <sup>2</sup> | Actual dose range, mg/m <sup>2</sup> (± 2 mg/m <sup>2</sup> ) | Corresponding eligible BSA <sup>a</sup> by ridaforolimus dose (10 mg tablet), m <sup>2</sup> |           |           |           |           |
|-------------------------|--------------------------------------|---------------------------------------------------------------|----------------------------------------------------------------------------------------------|-----------|-----------|-----------|-----------|
|                         |                                      |                                                               | 20 mg                                                                                        | 30 mg     | 40 mg     | 50 mg     | 60 mg     |
| 1                       | 22                                   | 24–20                                                         | 0.83–1.00                                                                                    | 1.25–1.50 | 1.67–2.00 |           |           |
| 2                       | 28                                   | 30–26                                                         | 0.67–0.76                                                                                    | 1.00–1.15 | 1.33–1.54 | 1.67–1.92 |           |
| 3                       | 33                                   | 35–31                                                         | 0.57–0.65                                                                                    | 0.86–0.97 | 1.14–1.29 | 1.43–1.61 | 1.71–1.94 |

<sup>a</sup>BSA (m<sup>2</sup>) = ([height (cm) × weight (kg)]/3,600)<sup>1/2</sup> as described by Mosteller RD (Simplified calculation of body-surface area. N Engl J Med. 1987; 317:1098). The maximum starting dose was 30 mg in patients aged 6 to 11 years and 40 mg in patients aged 12 to 18 years. For subsequent dose levels, the maximum doses were 40 and 50 mg in patients aged 6 to 11 years, and 50 and 60 mg in patients aged 12 to 18 years.

<sup>b</sup>Two additional planned dose levels (dose level –1, 17 mg/m<sup>2</sup>, and dose level –2, 11 mg/m<sup>2</sup>) were not used. BSA, body surface area.
